# Supplementary material
Source: PubMed Central journal article supplement (PMC4838007)
Supplement: supp_kfv129_toxsci-15-0330-File013.pdf [file supp_kfv129_toxsci-15-0330-File013.pdf]

|                   | Gradient off                                                                        | Gradient on                                                                          |
|-------------------|-------------------------------------------------------------------------------------|--------------------------------------------------------------------------------------|
| Control 1         | 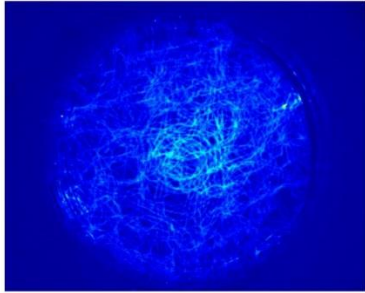   |    |
| Control 2         |    |    |
| Control 3         |   |   |
| Acrylamide 500μM  |  |  |
| Chlorpyrifos 50μM |  |  |

|                     | Gradient off                                                                        | Gradient on                                                                          |
|---------------------|-------------------------------------------------------------------------------------|--------------------------------------------------------------------------------------|
| Dichlorvos<br>100nM | 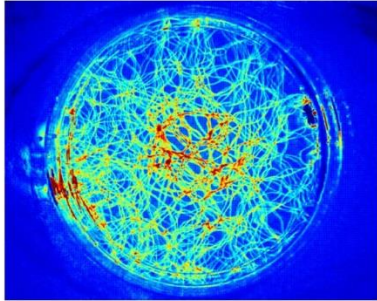   |    |
| DMSO 0.5%           |    |    |
| Ethanol<br>0.5%     |   |   |
| Glucose<br>55μM     |  |  |
| Methanol<br>2%      |  |  |

|                           | Gradient off                                                                       | Gradient on                                                                         |
|---------------------------|------------------------------------------------------------------------------------|-------------------------------------------------------------------------------------|
| Permethrin<br>100 $\mu$ M | 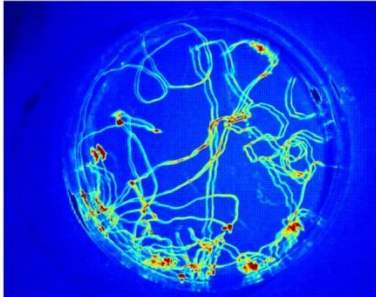  |   |
| SDS<br>1mg/L              |   |   |
| TritonX<br>25mg/L         |  |  |
