# Supplementary material
Source: PubMed Central journal article supplement (PMC4838007)

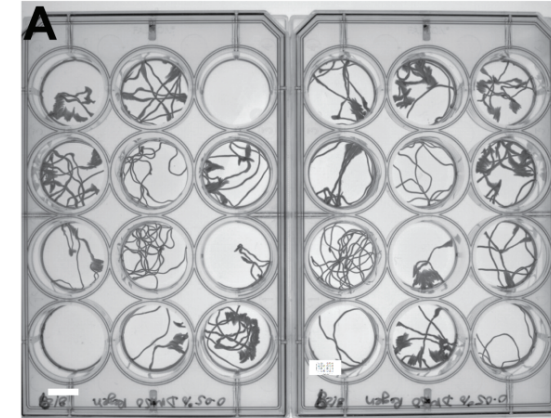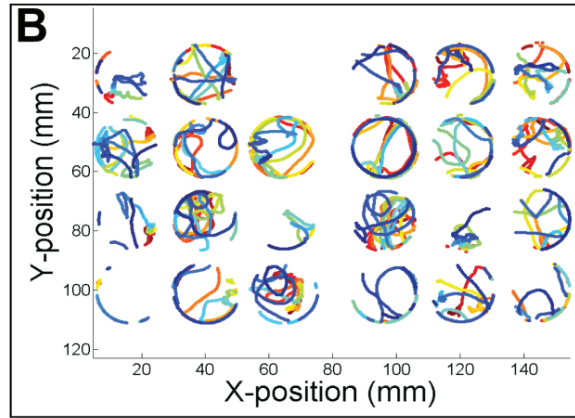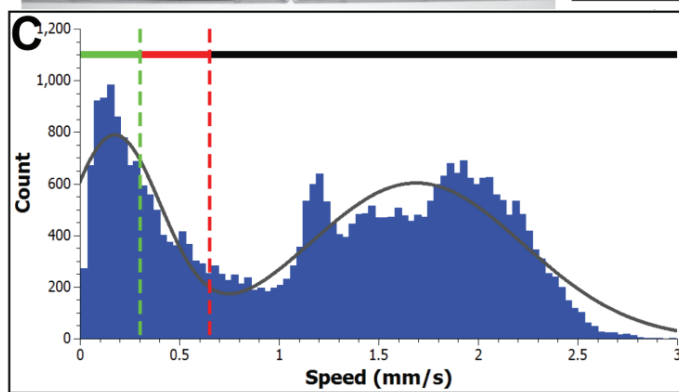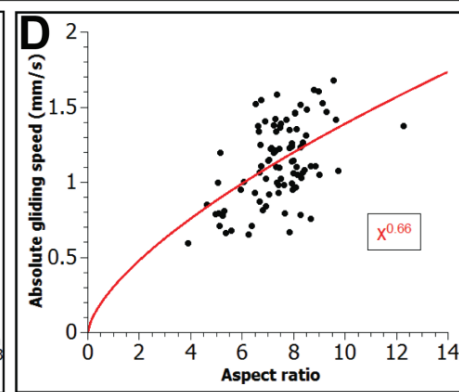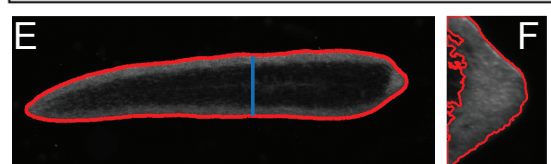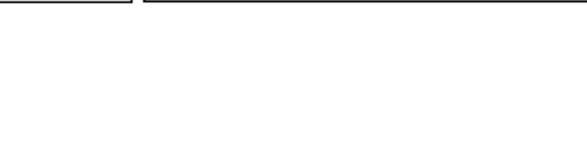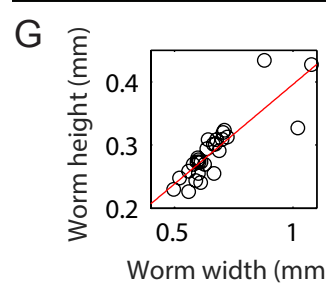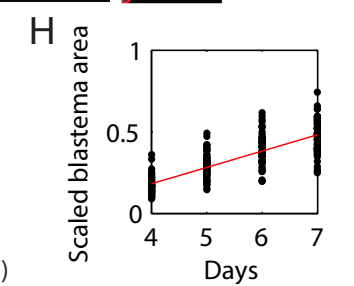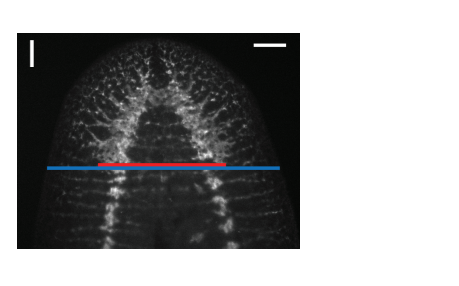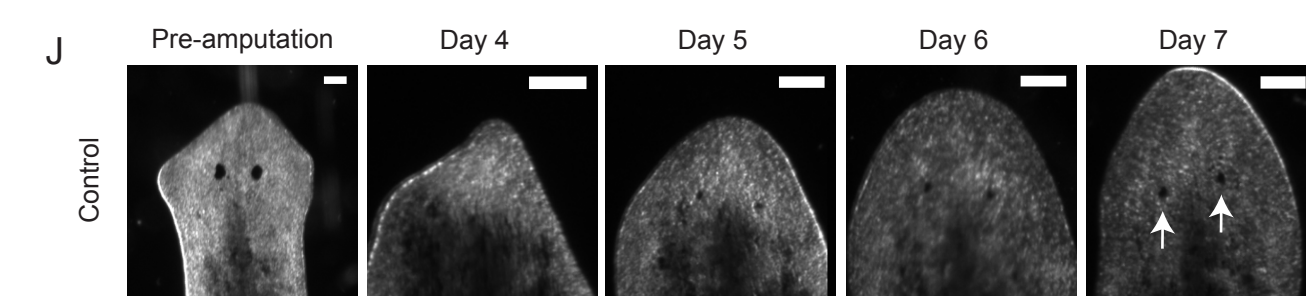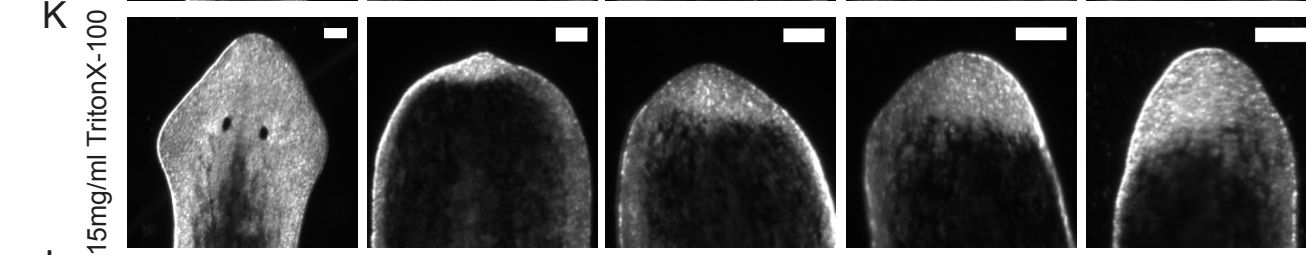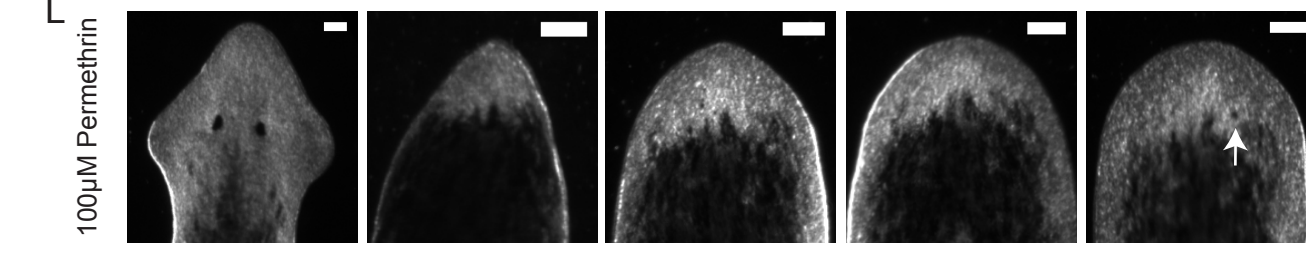

Supplement: supp_kfv129_toxsci-15-0330-File009.pdf [file supp_kfv129_toxsci-15-0330-File009.pdf]

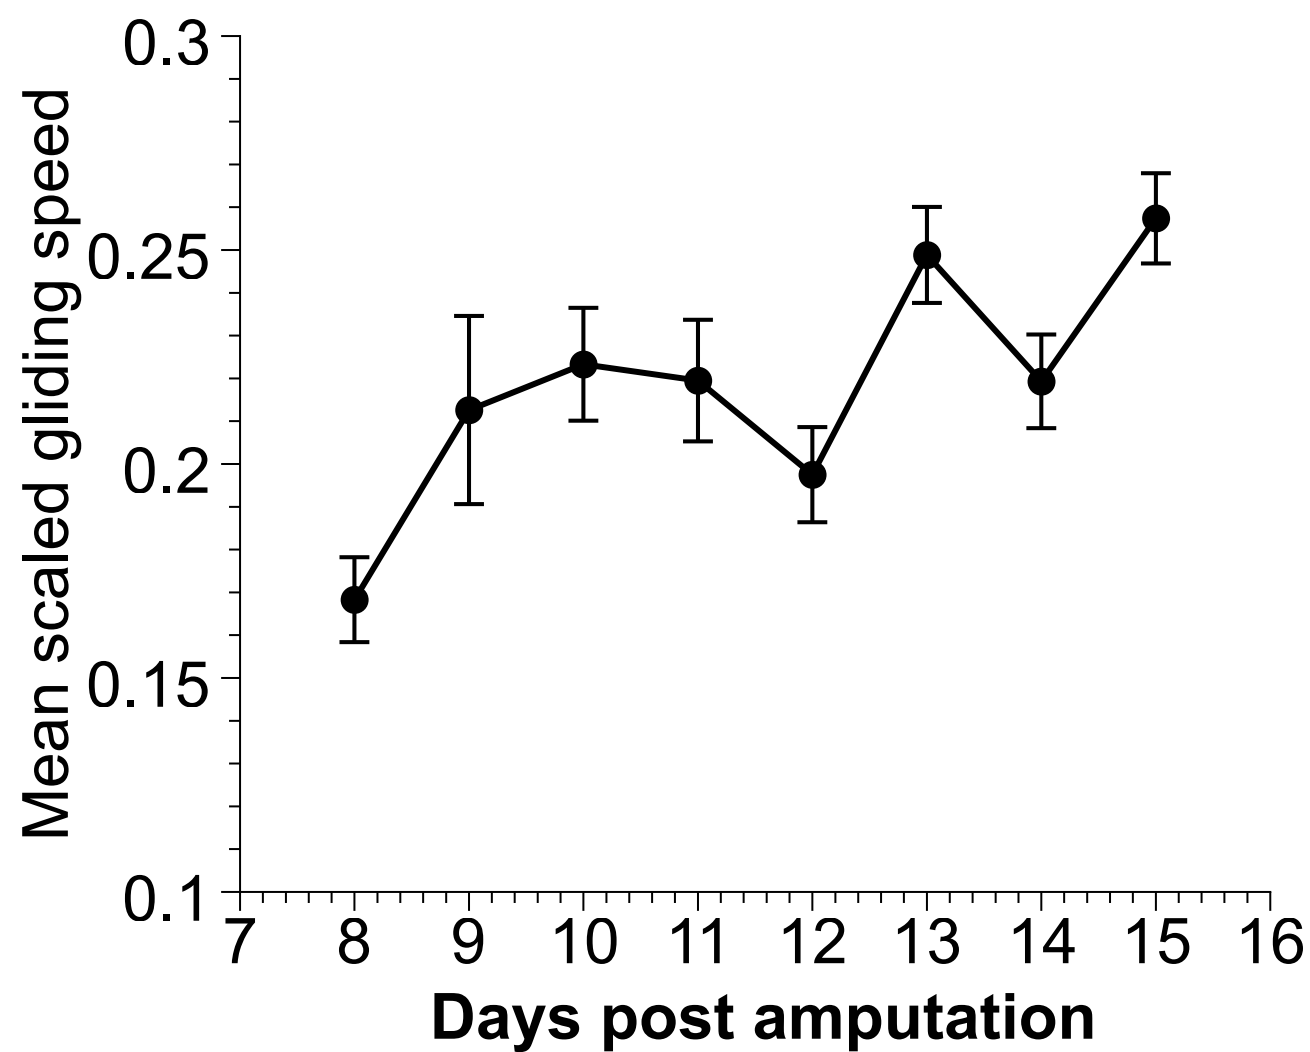

Supplement: supp_kfv129_toxsci-15-0330-File010.pdf [file supp_kfv129_toxsci-15-0330-File010.pdf]
